# Supplementary material for: Regulation of synaptic connectivity in schizophrenia spectrum by mutual neuron-microglia interaction
Source: PubMed Central journal article supplement (PMC10147621; doi:10.1038/s42003-023-04852-9), 2023-04-29
Supplement: 42003_2023_4852_MOESM1_ESM.pdf [file 42003_2023_4852_MOESM1_ESM.pdf]

1

2 **Supplementary Figure 1.**

3

4 **IBA1**

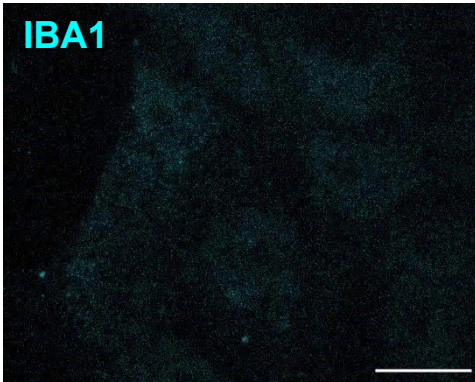

5 **SPI1**

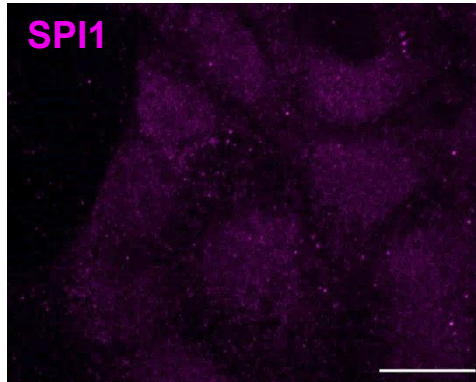

6

7

8

9

10

11 **CX3CR1**

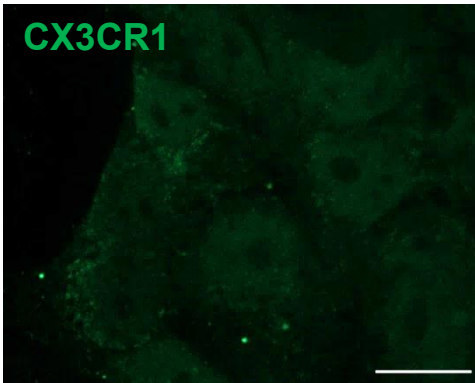

12 **DNA IBA1 CX3CR1 SPI1**

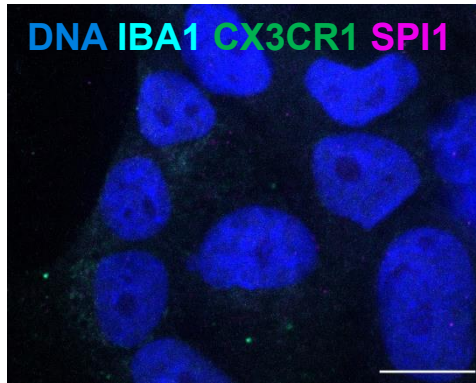

13

14

15

16

17

18

19

20

21

22

23

Supplementary Figure 1. Representative immunocytochemical staining of naïve iPSC that do not express microglia-specific markers, such as IBA1, CX3CR1 or SPI1. The brightness of the individual images was adjusted to the maximum to show absence of markers. Scale bar 20  $\mu$ m.

23

24 **Supplementary Figure 2.**

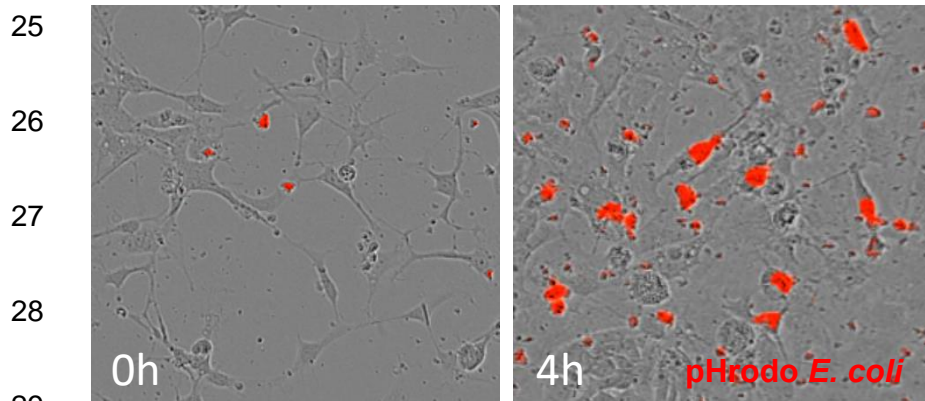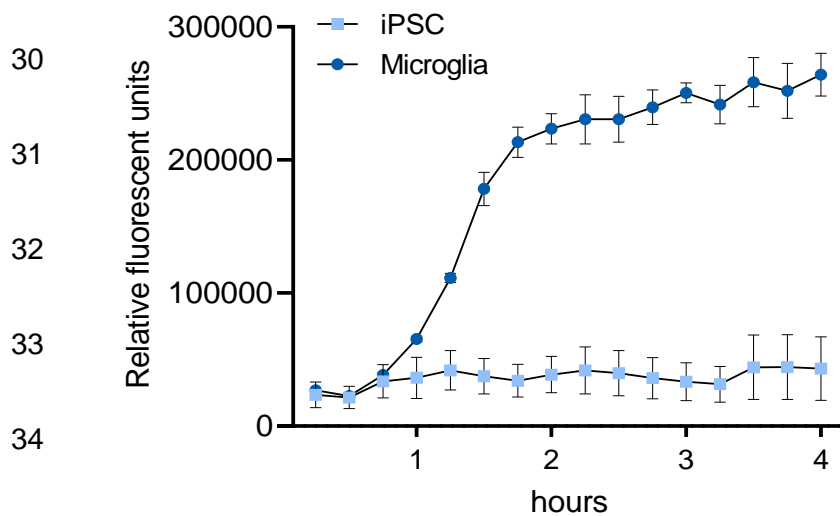

36 Supplementary Figure 2. iPSC-derived microglia are able to take up *Escherichia coli*-derived

37 bioparticles that are labelled with a pH-sensitive dye (pHrodo Red). Fluorescence increases

38 upon phagocytosis of particles by microglia. Differentiated, day 19 microglia and separately,

39 naive iPSC as negative control, were incubated with *E. coli* bioparticles and the change in

40 fluorescence was measured by live-cell imaging over a period of 4 hours with nine images

41 per well being taken every 15 minutes. Data are represented as mean  $\pm$  SEM.

42

43 **Supplementary Figure 3.**

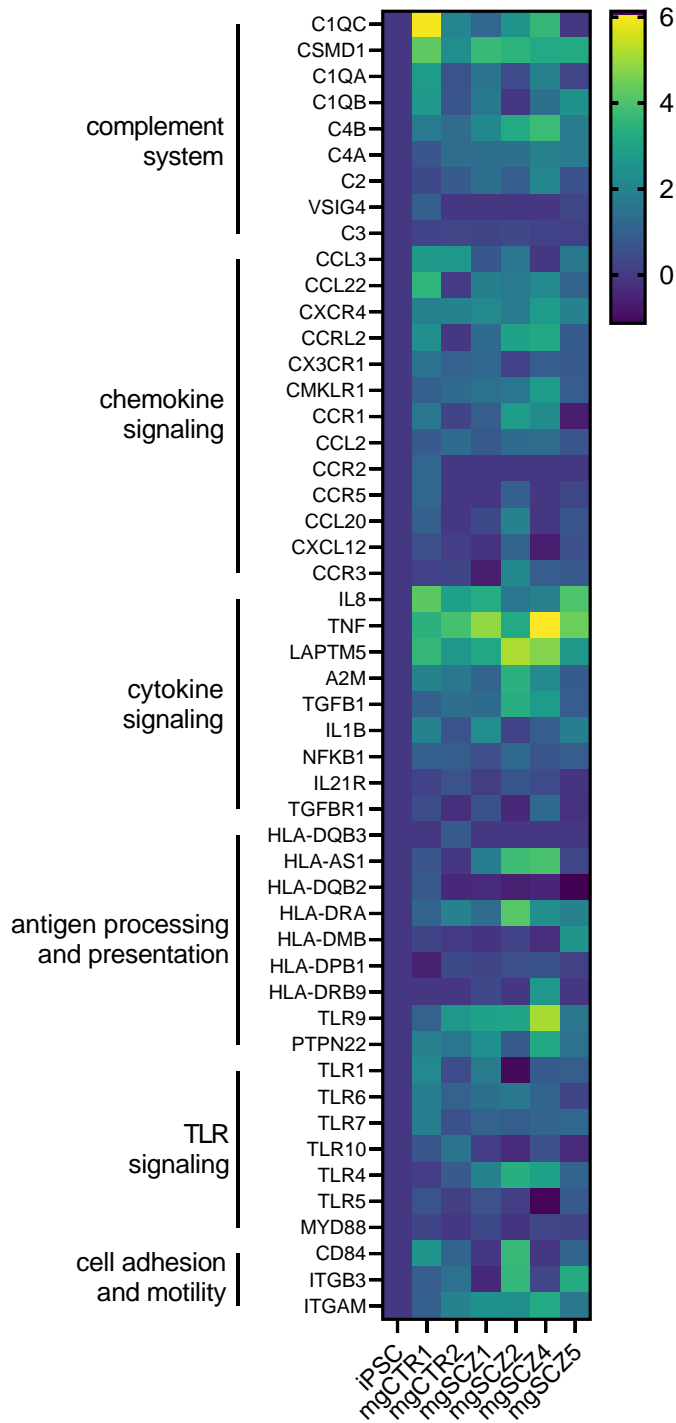

44

45 Supplementary Figure 3. iPSC-derived microglia reveal expression of a variety of immune-  
 46 related genes as revealed by RNA sequencing. Displayed is the log2 fold change  
 47 (normalized read counts +1) of microglia to naive iPSC. (n = 3 for each group).

48

49 **Supplementary Figure 4.**

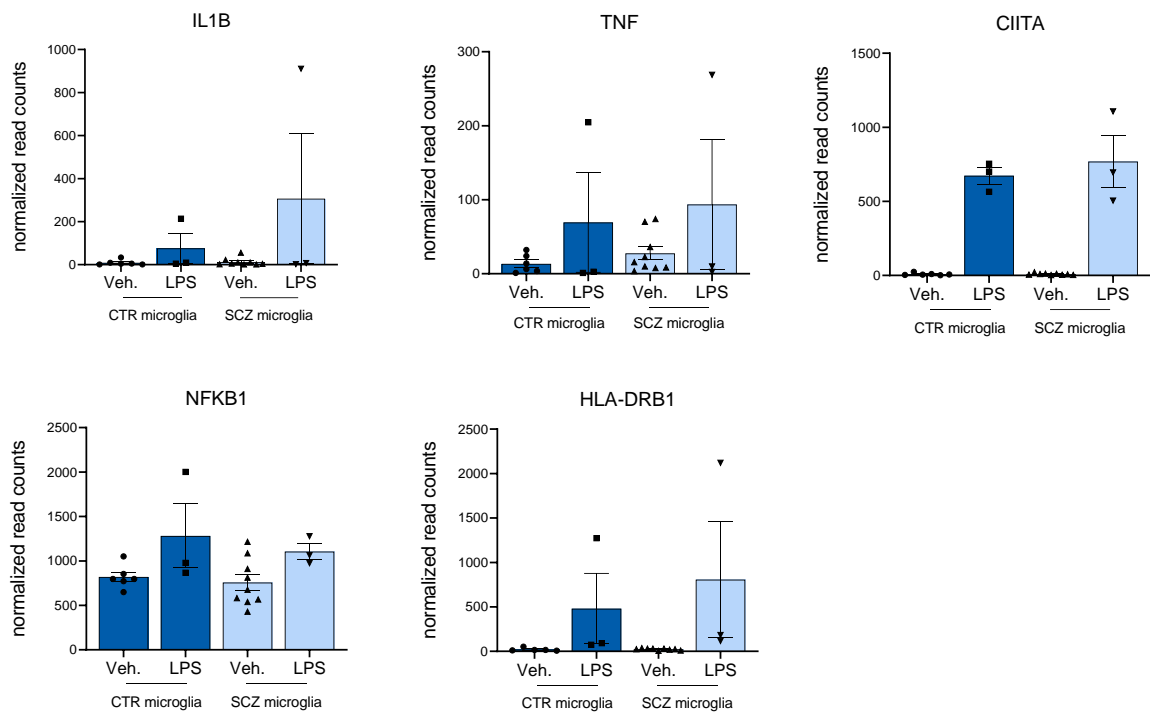

50

51 Supplementary Figure 4. RNA sequencing reveals that both microglia from CTR and SCZ  
 52 donors respond to LPS stimulation with increased expression of pro-inflammatory genes.

53 The number of points represents the number of biological replicates. Data are represented  
 54 as mean  $\pm$  SEM. (IL1B: CTR microglia Veh. n = 6; CTR microglia LPS n = 3; SCZ microglia

55 Veh. n = 9; SCZ microglia LPS n = 3; TNF: CTR microglia Veh. n = 6; CTR microglia LPS n =  
 56 3; SCZ microglia Veh. n = 9; SCZ microglia LPS n = 3; CIITA: CTR microglia Veh. n = 6;

57 CTR microglia LPS n = 3; SCZ microglia Veh. n = 9; SCZ microglia LPS n = 3; NFKB1: CTR  
 58 microglia Veh. n = 6; CTR microglia LPS n = 3; SCZ microglia Veh. n = 9; SCZ microglia LPS

59 n = 3; HLA-DRB1: CTR microglia Veh. n = 5; CTR microglia LPS n = 3; SCZ microglia Veh. n  
 60 = 9; SCZ microglia LPS n = 3)

61

62 **Supplementary Figure 5.**

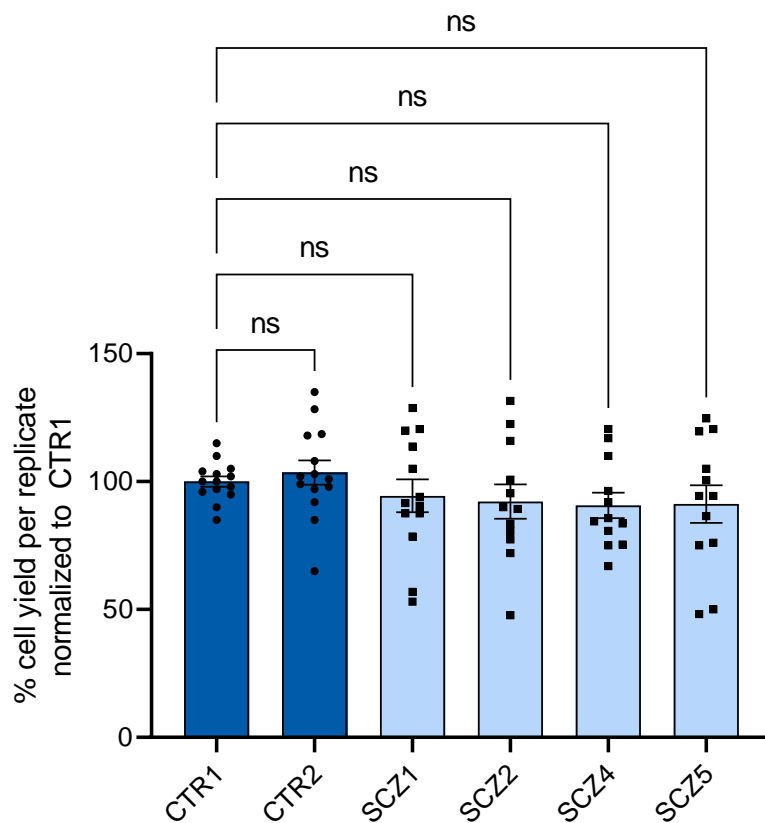

63

64 Supplementary Figure 5. Differentiation of CTR and SCZ microglia did not reveal differences  
65 in microglia cell yield over several replicates. Each single data point represents the individual  
66 cell yield of each line in one biological replicate. Kruskal-Wallis test with Dunn's post hoc test,  
67  $H(5) = 6.085$ , all groups were compared to CTR1. Data are represented as mean  $\pm$  SEM,  
68 (CTR1 n = 12; CTR2 n = 14; SCZ1 n = 13, SCZ2 n = 12; SCZ4 n = 12; SCZ5 n = 12).

69



70 **Supplementary Figure 6.**

71

72

73

74

75

76

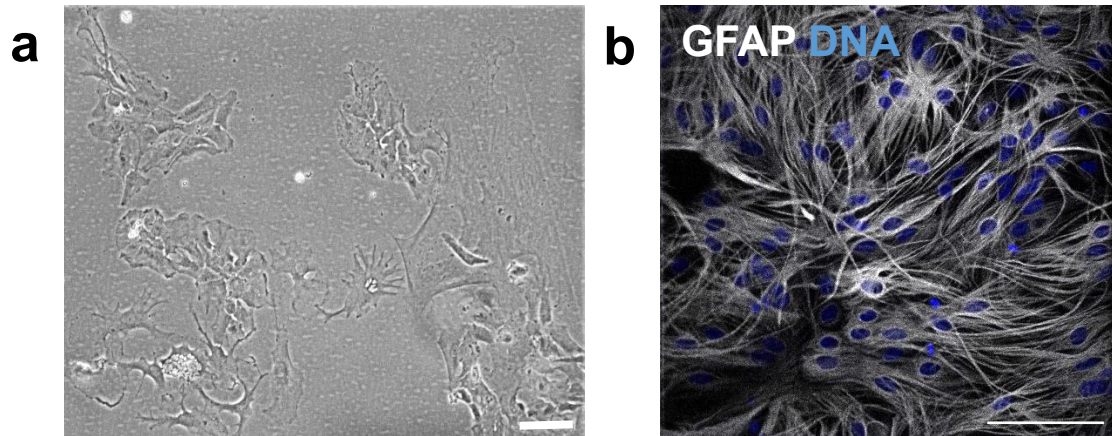

77

78

79

80

81

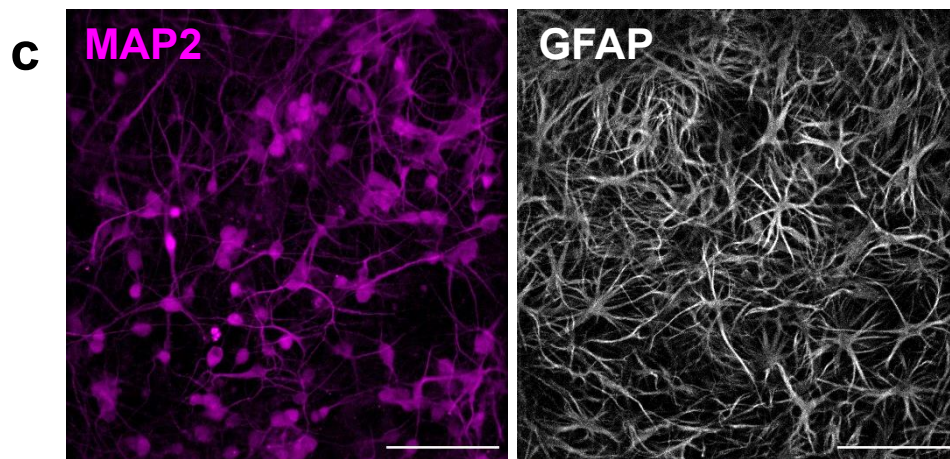

82

83

84

85

86

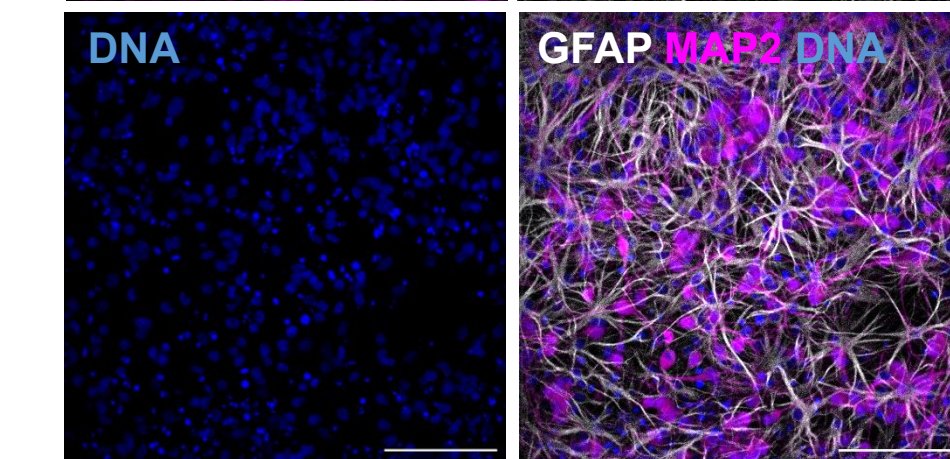

87 Supplementary Figure 6. Characterization of murine astrocytes that were used routinely in  
88 every replicate for improved neuronal culture and maturation. **a** Phase contrast picture of  
89 GFAP positive, murine astrocytes 9 days *in vitro* after preparation from newborn mice. Scale  
90 bar 100  $\mu$ m. **b** Fixed and stained astrocytes in mono-culture after 9 days *in vitro*. Scale bar

91 100  $\mu\text{m}$ . **c** Fixed and stained co-cultures of GFAP positive astrocytes and iPSC-derived

92 MAP2 positive neurons. Scale bar 100  $\mu\text{m}$ .

93

94 **Supplementary Figure 7.**

95

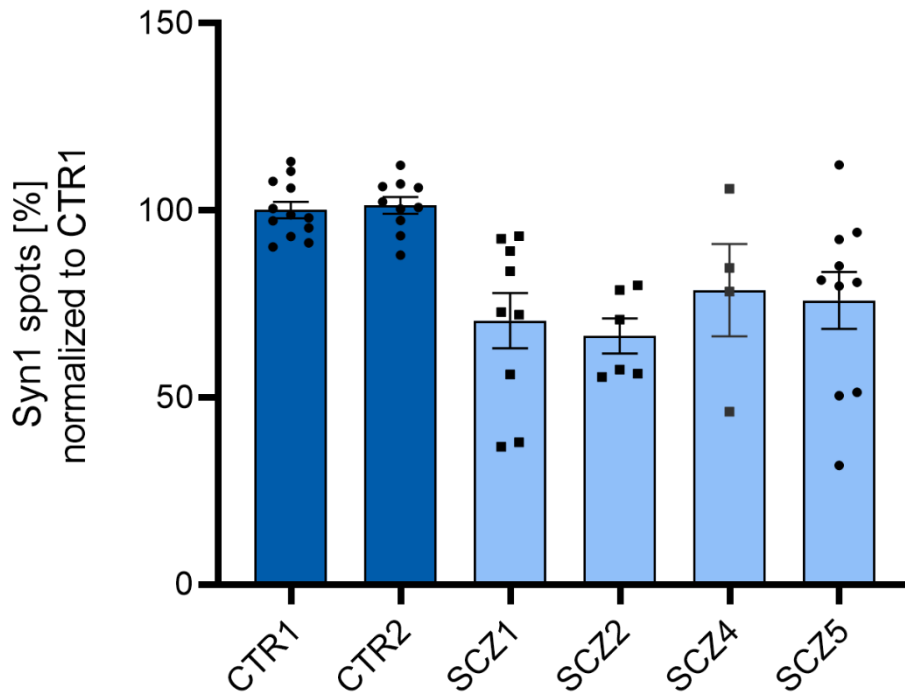

96

97 Supplementary Figure 7: Mean SYN1 spot density in individual replicates as representation  
98 for the reproducibility and robustness of analyzed parameters. From each clone CTR1 and 2,  
99 SCZ 1,2,4 and 5 within one biological replicate (= one independent differentiation) more than  
100 four images were analyzed to calculate mean Syn1 spot density represented by a point in the  
101 graph. The number of points represents the number of biological replicates. Data are  
102 represented as mean  $\pm$  SEM. (CTR1 n = 12; CTR2 n = 10; SCZ1 n = 9; SCZ2 n = 6; SCZ4 n  
103 = 4; SCZ5 n = 10)

104



Supplementary Figure 8.

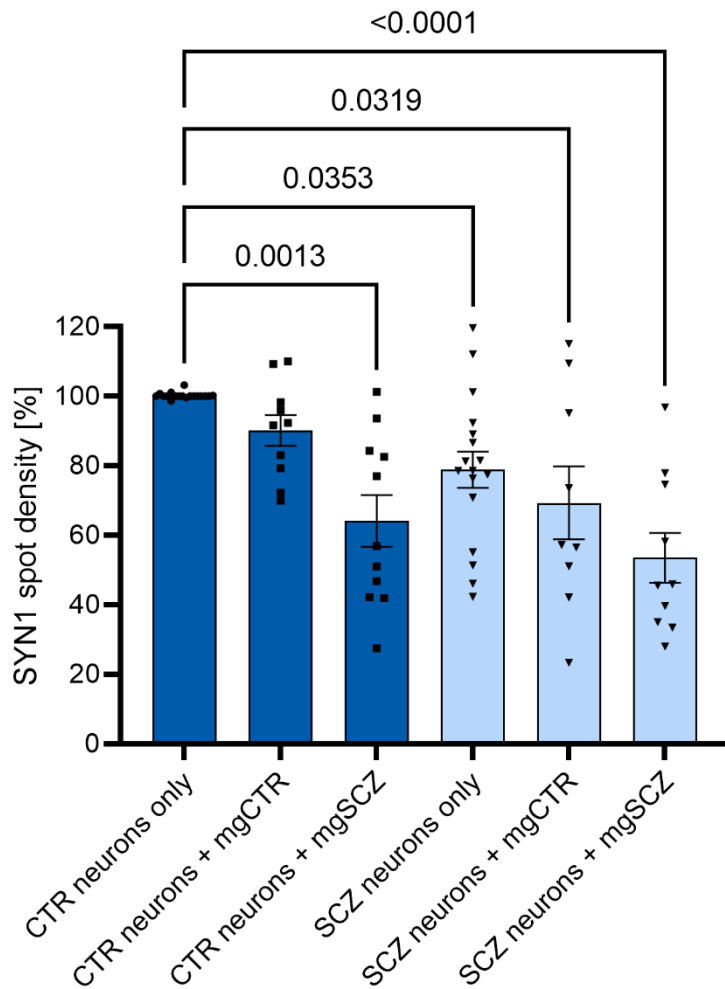

Supplementary Figure 8. Addition of microglia to neuronal cultures leads to a reduction in SYN1 spot density. Presynaptic density as quantified by SYN1 positive spots within a MAP2 positive neuronal network was quantified. Addition of microglia significantly reduces the presynaptic density compared to neuronal cultures without co-cultured microglia. The number of points represents the number of biological replicates. Kruskal-Wallis test with Dunn's post hoc test,  $H(5) = 30.77$ . Data are normalized to CTR neurons only and are represented as mean  $\pm$  SEM. (CTR neurons only  $n = 18$ ; CTR neurons + mgCTR  $n = 10$ ; CTR neurons + mgSCZ  $n = 11$ ; SCZ neurons only  $n = 17$ ; SCZ neurons + mgCTR  $n = 9$ ; SCZ neurons + mgSCZ  $n = 10$ ).

118 **Supplementary Figure 9.**

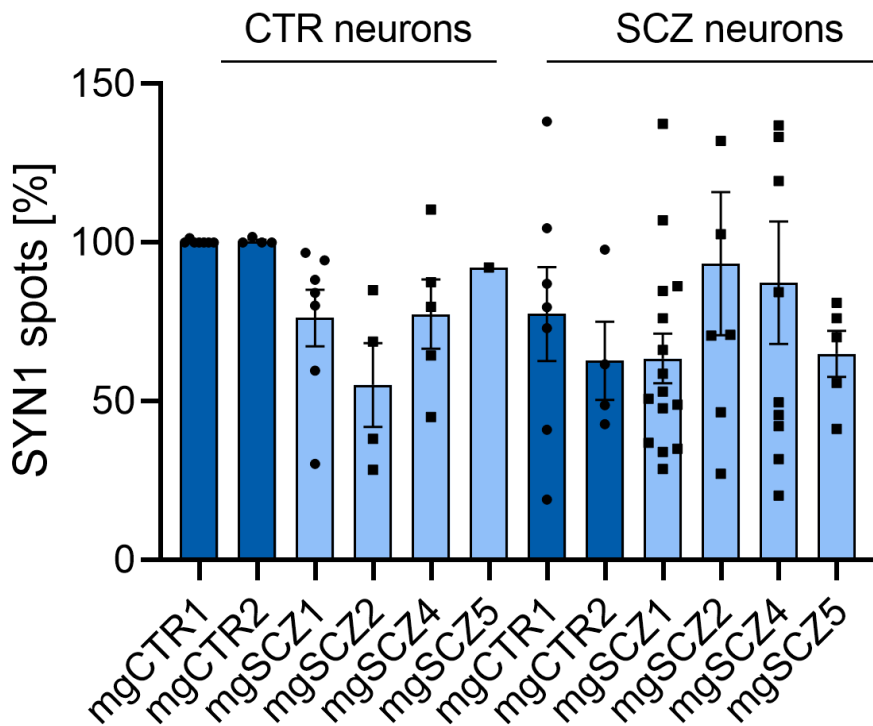

119

120 Supplementary Figure 9. Decrease in synaptic density after neuronal co-culture with  
 121 microglia derived from the individual clones used in this study. Control neurons without  
 122 added microglia were set 100 %. The number of points represents the number of biological  
 123 replicates. Data are normalized to CTR neurons only and are represented as mean  $\pm$  SEM.  
 124 (CTR neurons: mgCTR1 n = 7, mgCTR2 n = 4, mgSCZ1 n = 7, mgSCZ2 n = 4, mgSCZ3 n =  
 125 5, mgSCZ5 n = 1; SCZ neurons: mgCTR n = 7, mgCTR2 n = 4, mgSCZ1 n = 15, mgSCZ2 n  
 126 = 7, mgCTR1 n = 7, mgCTR2 n = 4, mgSCZ1 n = 15, mgSCZ2 n = 7, mgSCZ4 n = 10,  
 127 mgSCZ5 n = 5)

128

129 **Supplementary Figure 10.**

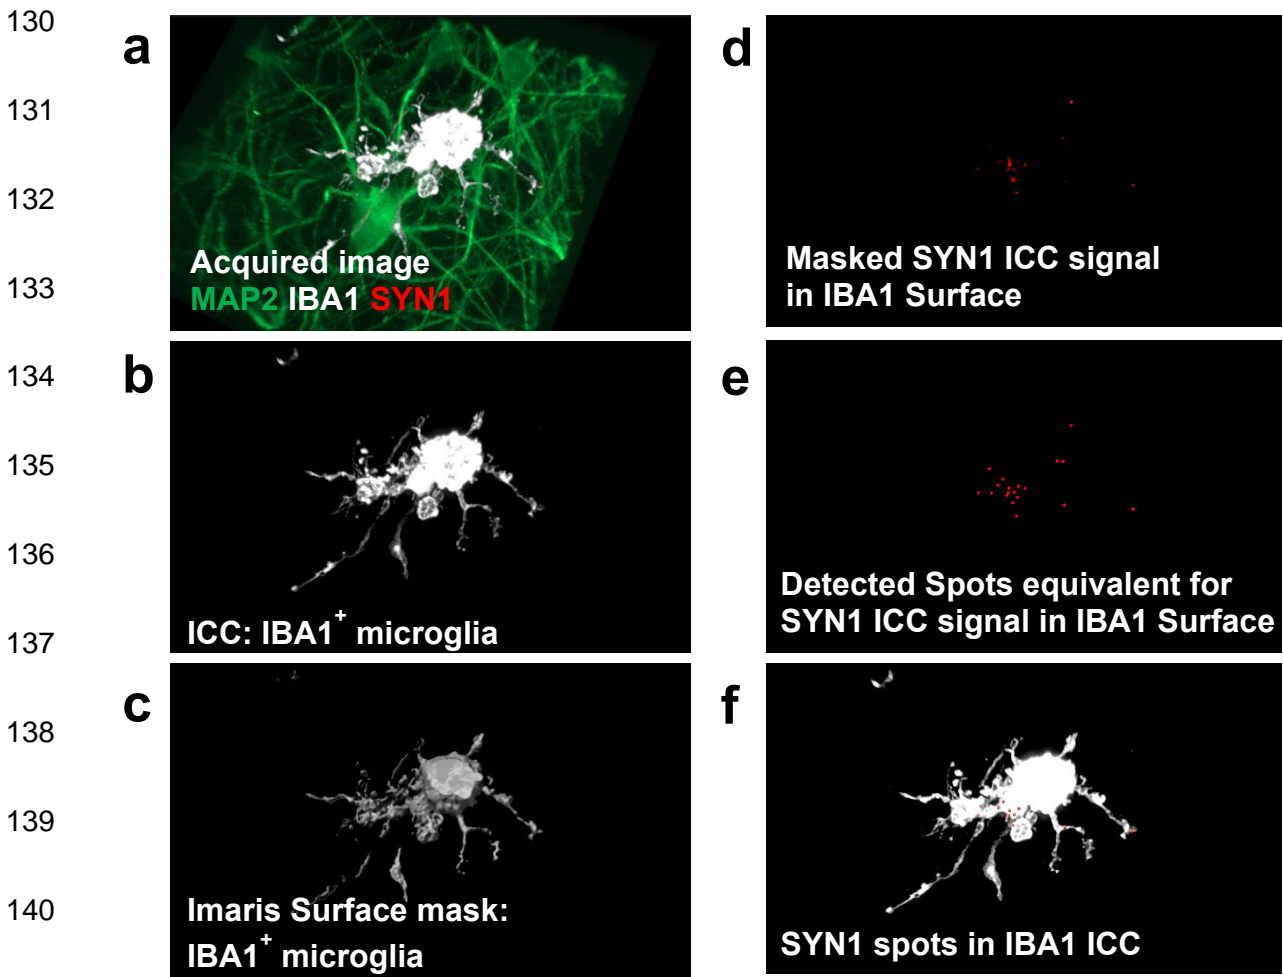

142 Supplementary Figure 10. 3D Image Analysis using Imaris Bitplane to determine synapse  
143 uptake in microglia. **a** Acquired images are saved as 3D z-stacks. **b** The channel for IBA1  
144 positive microglia is selected. **c** A surface mask is created for IBA1 positive microglia with a  
145 threshold that covers the whole microglial cell, including areas with lower IBA expression.  
146 The threshold is always kept constant throughout the analysis of individual experiments. **d**  
147 The created IBA1/microglia surface is masked using the SYN1 channel, leading to a new  
148 channel reflecting the SYN1 staining within microglia. **e** Spot detection is used to visualize  
149 SYN1 spots within microglia. **f** SYN1 spots are within IBA1 positive microglia.

151 **Supplementary Figure 11.**

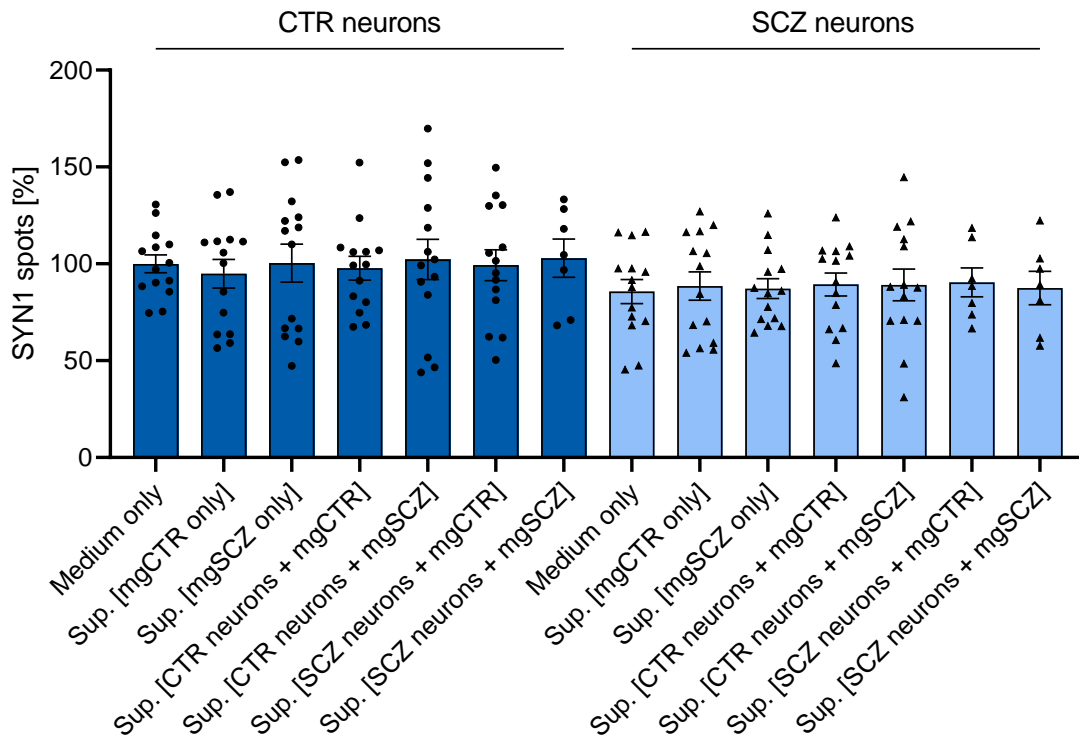

152

153 Supplementary Figure 11. CTR and SCZ neurons were incubated with conditioned medium  
 154 of previous microglia-neuron co-cultures to determine if the direct cell-cell contact is  
 155 responsible for the observed decline in presynaptic density or if soluble factors induce  
 156 synapse depletion. CTR neurons and SCZ neurons were cultivated in conditioned medium  
 157 for 72 hours and SYN1 spots were quantified within MAP2 positive neuronal networks. Co-  
 158 culture with supernatants led to no significant changes in SYN1 spot density. The number of  
 159 points represents the number of biological replicates. Data are normalized to CTR neurons in  
 160 medium only and are represented as mean  $\pm$  SEM. (CTR neurons: Medium only n = 14;  
 161 mgCTR only n = 14; mgSCZ only n = 14; CTR neurons + mgCTR n = 14; CTR neurons +  
 162 mgSCZ n = 14; SCZ neurons + mgCTR n = 14; SCZ neurons + mgSCZ n = 7; SCZ neurons:  
 163 Medium only n = 14; mgCTR only n = 14; mgSCZ only n = 14; CTR neurons + mgCTR n =  
 164 14; CTR neurons + mgSCZ n = 14; SCZ neurons + mgCTR n = 7; SCZ neurons + mgSCZ n  
 165 = 7)

166

167 **Supplementary Figure 12.**

168

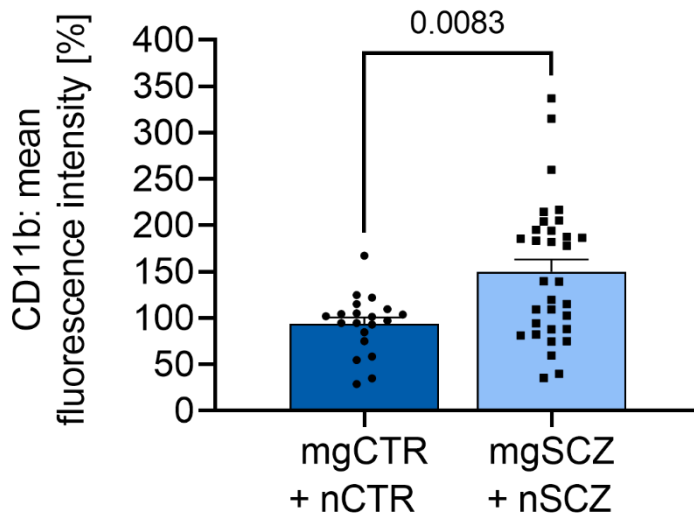

169

170 Supplementary Figure 12. CD11b mean fluorescence intensity in co-cultures of [CTR  
171 microglia + CTR neurons] and [SCZ microglia + SCZ neurons]. The number of points  
172 represents the number of biological replicates. Unpaired, two-tailed Mann Whitney U test  
173 was employed for pairwise comparisons,  $p = 0.0083$ . Data are represented as mean  $\pm$  SEM.  
174 (mgCTR + nCTR  $n = 20$ ; mgSCZ + nSCZ  $n = 32$ ).

175

176 **Supplementary Figure 13.**

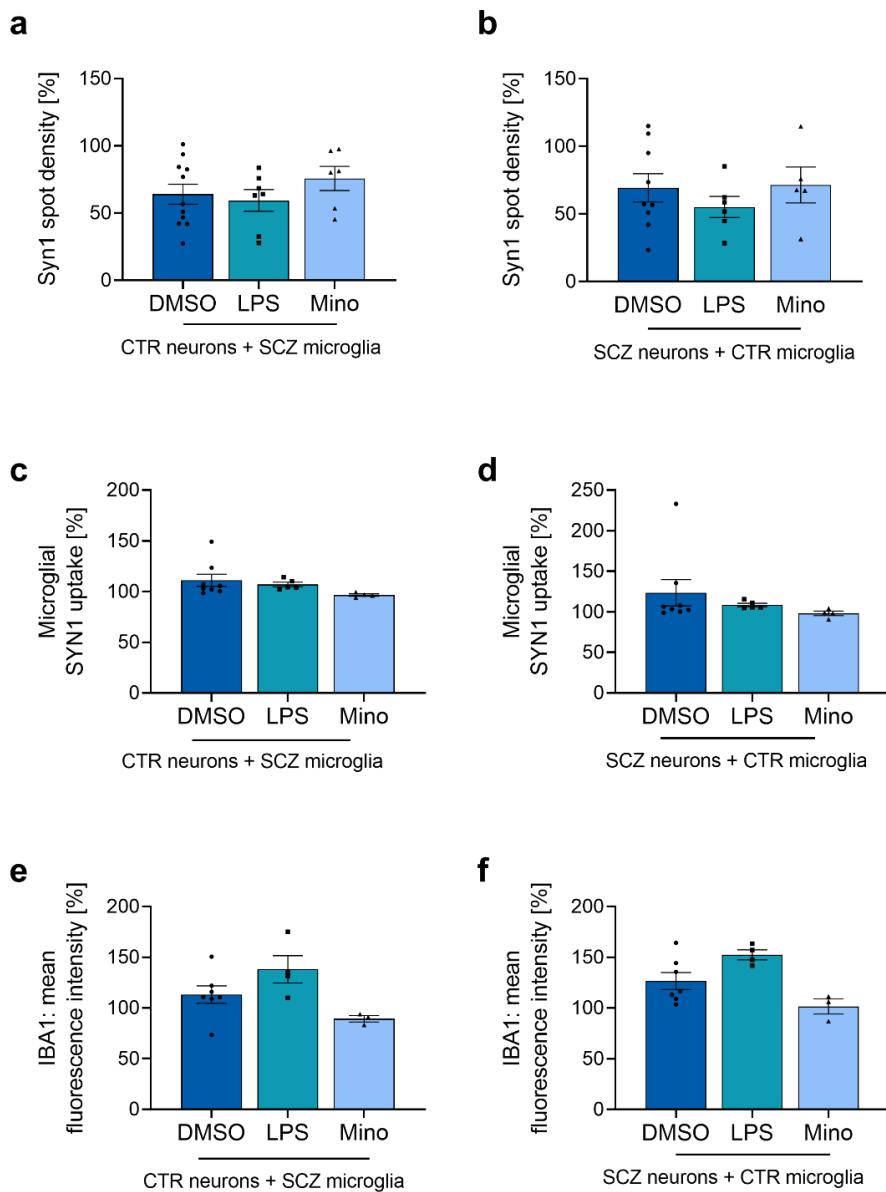

177 Supplementary Figure 13. SYN1 spots, SYN1 uptake and IBA1 mean fluorescence intensity  
 178 in cross-combinations of [CTR neurons + SCZ microglia] and [SCZ neurons + CTR  
 179 microglia]. The number of points represents the number of biological replicates and are  
 180 represented as mean  $\pm$  SEM. (**a**: CTR neurons + SCZ microglia: DMSO n = 11, LPS n = 7,  
 181 Mino n = 6; **b**: SCZ neurons + SCZ microglia: DMSO n = 9, LPS n = 6, Mino n = 5; **c**: CTR  
 182 neurons + SCZ microglia: DMSO n = 8, LPS n = 5, Mino n = 4; **d**: SCZ neurons + SCZ  
 183 microglia: DMSO n = 8, LPS n = 5, Mino n = 4; **e**: CTR neurons + SCZ microglia: DMSO n =  
 184 7, LPS n = 4, Mino n = 3; **f**: SCZ neurons + SCZ microglia: DMSO n = 7, LPS n = 4, Mino n =  
 185 3)



186 **Supplementary Table 1. Selection criteria of SCZ patients.**

187

188 Inclusion criteria schizophrenia:

- 189 • Diagnosis of disease investigated by SCID-I according to DSM-IV
- 190 • One first-degree relative also with the diagnosis of a psychotic disorder
- 191 • Age: 18 – 65 years

192

193 Exclusion criteria:

- 194 • Any other diagnosis according to DSM-IV
- 195 • No acute episode of psychosis
- 196 • Current addiction, except for nicotine and caffeine
- 197 • Use of illegal substances within 4 weeks before study
- 198 • Mentally handicapped persons
- 199 • Pregnancy or lactation
- 200 • Suicidal tendency or danger for others

201

| ID   | Sex    | Age at biopsy | Family history            | Diagnosis according to DSM IV      | Diagnosis according to DSM5                       | Medication                                                        | Dominant clinical symptoms diagnosed in SCZ patients             |
|------|--------|---------------|---------------------------|------------------------------------|---------------------------------------------------|-------------------------------------------------------------------|------------------------------------------------------------------|
| SCZ1 | male   | 37            | Mother diseased           | Schizo-affective disorder / 295.70 | Schizo-affective disorder – bipolar type / 295.70 | Lithium<br>450 – 0 – 450 mg<br>Quetiapine ret.<br>0 – 0 – 800 mg  | cognitive impairment, formal thought disorder, paranoid thoughts |
| SCZ2 | female | 54            | Sister diseased           | Residual type / 295.60             | Schizophrenia spectrum / 295.90                   | Clozapine<br>0 – 100 – 400 mg                                     | formal thought disorder, paranoid thoughts, hallucinations       |
| SCZ4 | male   | 50            | Mother + brother diseased | Paranoid type / 295.30             | Schizophrenia spectrum / 295.90                   | Amisulpride<br>150 mg – 0 – 0<br>Mirtazapine<br>0 – 0 – 0 – 30 mg | formal thought disorder, paranoid thoughts, persecutory delusion |
| SCZ5 | female | 27            | Mother diseased           | Schizo-affective disorder / 295.70 | Schizo-affective disorder – bipolar type / 295.70 | Olanzapine<br>0 – 0 – 7,5 mg<br>Quetiapine<br>50 mg if required   | paranoid thoughts, persecutory delusion, mania, mutism           |

202

203

204

205

206 **Supplementary Table 2. Significantly deregulated genes in untreated CTR**  
 207 **microglia vs. untreated SCZ microglia.**  
 208

| Gene ID         | Gene       | Log2 Fold Change | P-value  | FDR P-value |
|-----------------|------------|------------------|----------|-------------|
| ENSG00000053438 | NNAT       | -8,80            | 2,16E-39 | 1,06E-34    |
| ENSG00000134184 | GSTM1      | -7,80            | 1,14E-13 | 2,81E-09    |
| ENSG00000022556 | NLRP2      | -7,60            | 2,66E-12 | 4,35E-08    |
| ENSG00000231007 | CDC20P1    | -4,33            | 3,80E-11 | 4,67E-07    |
| ENSG00000197582 | GPX1P1     | -5,26            | 9,28E-11 | 9,13E-07    |
| ENSG00000152726 | FAM21B     | -1,78            | 2,35E-09 | 1,93E-05    |
| ENSG00000267374 | LINC00669  | -3,48            | 2,48E-08 | 1,74E-04    |
| ENSG00000267270 | AC139100.2 | -2,37            | 6,02E-07 | 3,70E-03    |
| ENSG00000013297 | CLDN11     | -2,55            | 7,01E-07 | 3,83E-03    |
| ENSG00000262074 | SNORD3B-2  | -2,17            | 7,96E-07 | 3,91E-03    |
| ENSG00000230567 | FAM203B    | -6,61            | 1,44E-06 | 6,45E-03    |
| ENSG00000204169 | AGAP7      | -4,58            | 2,57E-06 | 1,05E-02    |
| ENSG00000198558 | HIST1H4L   | 2,88             | 2,78E-06 | 1,05E-02    |
| ENSG00000135828 | RNASEL     | -2,03            | 6,12E-06 | 2,15E-02    |
| ENSG00000240666 | MME-AS1    | -5,41            | 7,42E-06 | 2,39E-02    |
| ENSG00000183506 | PI4KAP2    | -0,87            | 7,78E-06 | 2,39E-02    |
| ENSG00000168497 | SDPR       | -2,82            | 1,00E-05 | 2,90E-02    |
| ENSG00000236816 | ANKRD20A7P | -3,24            | 1,14E-05 | 3,12E-02    |

209  
 210 Differentially expressed genes were identified at a significance threshold of  $p < 0.05$  (FDR  
 211 corrected p-values). iPSC were derived from two controls ( $n = 2$ ) and microglia were derived  
 212 from four patients and two healthy controls in three independent experiments ( $n = 18$ ).
